# Supplementary material
Source: PubMed Central journal article supplement (PMC5127388)
Supplement: NIHMS790117-supplement-02.pdf [file NIHMS790117-supplement-02.pdf]

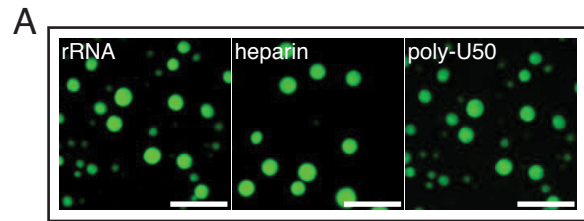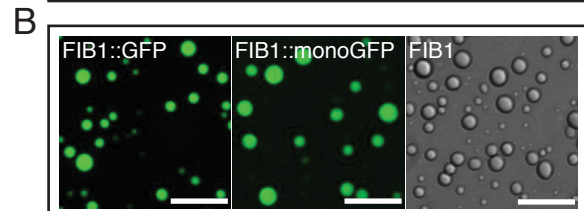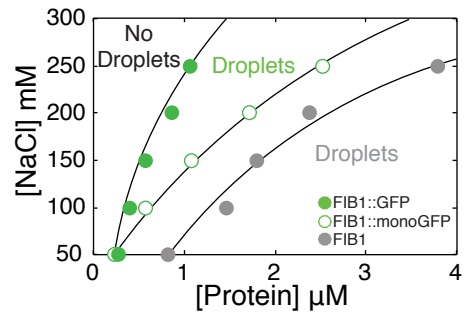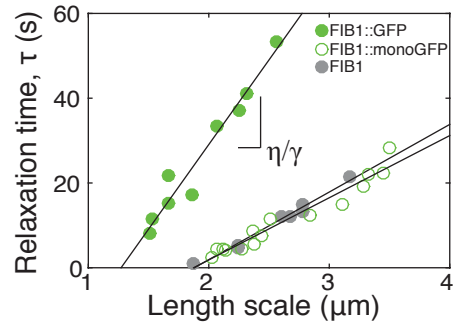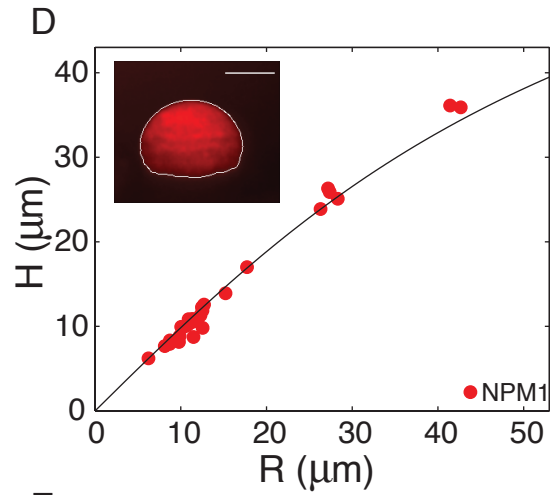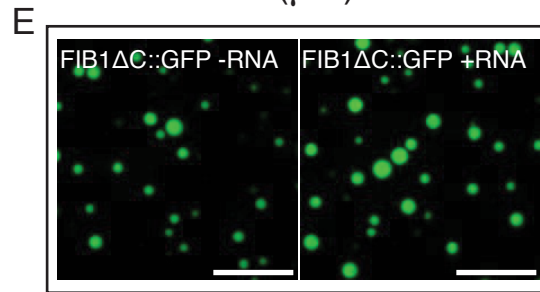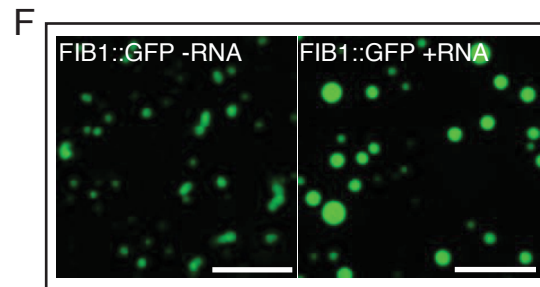

**C**

|                               | Inverse Capillary Velocity        | Viscosity       | Surface Tension      |
|-------------------------------|-----------------------------------|-----------------|----------------------|
|                               | $\eta/\gamma$ (s/ $\mu\text{m}$ ) | $\eta$ (Pa-s)   | $\gamma$ (N/m)       |
| <i>in vitro</i> NPM1          | $0.3 \pm 0.07$                    | $0.74 \pm 0.06$ | $8 \pm 2 \text{E-}7$ |
| <i>in vivo</i> GC (NPM1)      | $30 \pm 5$                        | -               | $4 \pm 1 \text{E-}7$ |
| <i>in vitro</i> FIB1::GFP     | $40 \pm 10$                       | $\sim 100$      | -                    |
| <i>in vitro</i> FIB1::monoGFP | $15 \pm 2$                        | -               | -                    |
| <i>in vitro</i> FIB1          | $16 \pm 2$                        | -               | -                    |
| <i>in vivo</i> DFC (FIB1)     | $80 \pm 15$                       | -               | -                    |
| <i>in vitro</i> FIB1ΔC        | $0.5 \pm 0.04$                    | $11 \pm 2$      | -                    |
