# Supplementary material
Source: PubMed Central journal article supplement (PMC5127388)

A

FIB1 $\Delta$ C+NPM1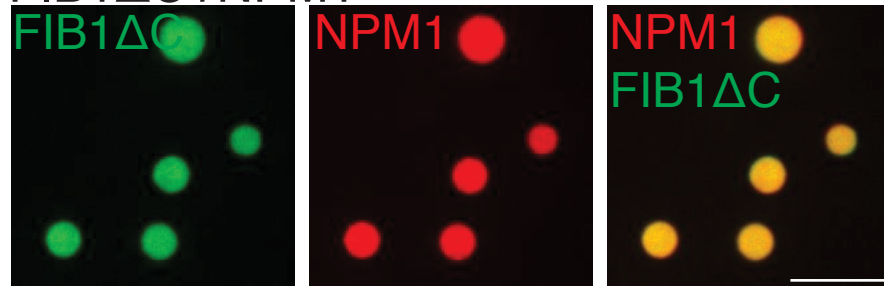FIB1 $\Delta$ N+NPM1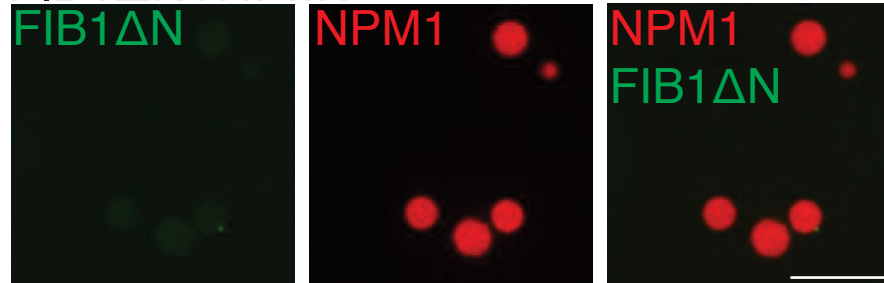FIB1+NPM1 $\Delta$ C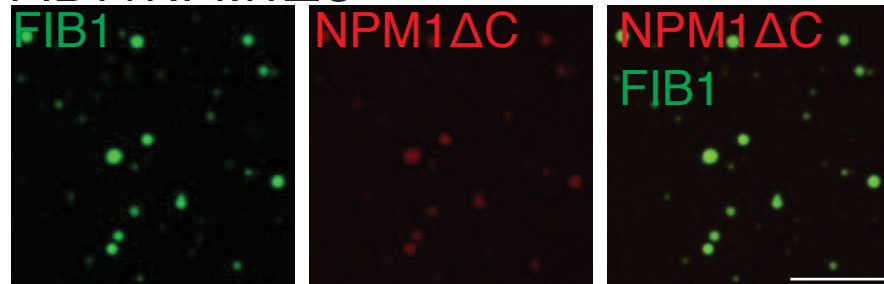FIB1+NPM1 $\Delta$ N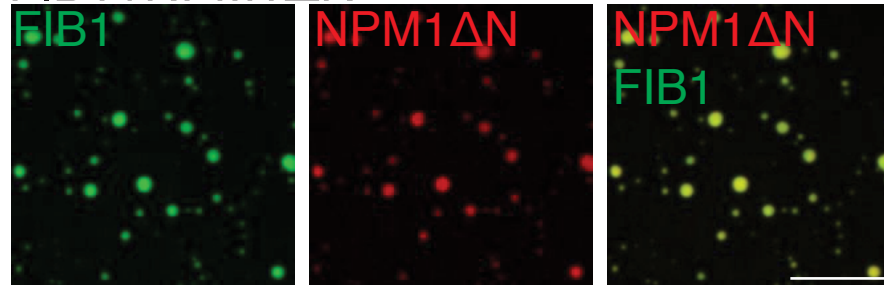

B

FIB1+NPM1 $\Delta$ N

rRNA

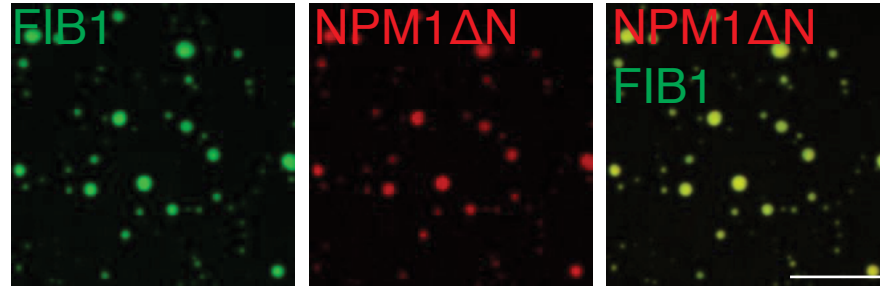

poly-U50

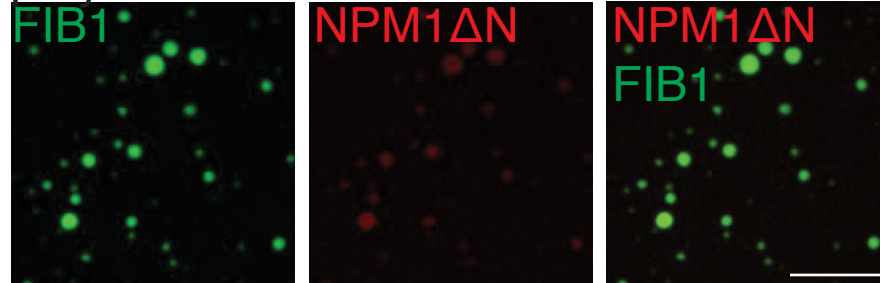

C

FIB1+NPM1 $\Delta$ C

rRNA

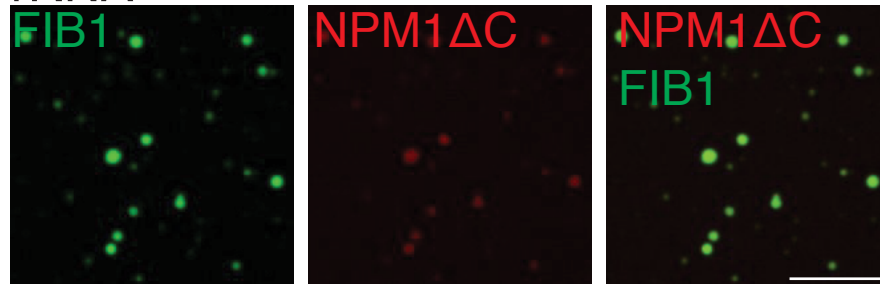

poly-U50

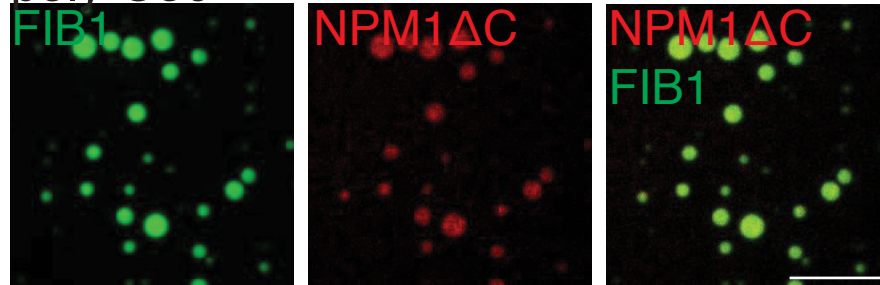

Supplement: NIHMS790117-supplement-05.pdf [file NIHMS790117-supplement-05.pdf]
