# Supplementary material
Source: PubMed Central journal article supplement (PMC5127388)

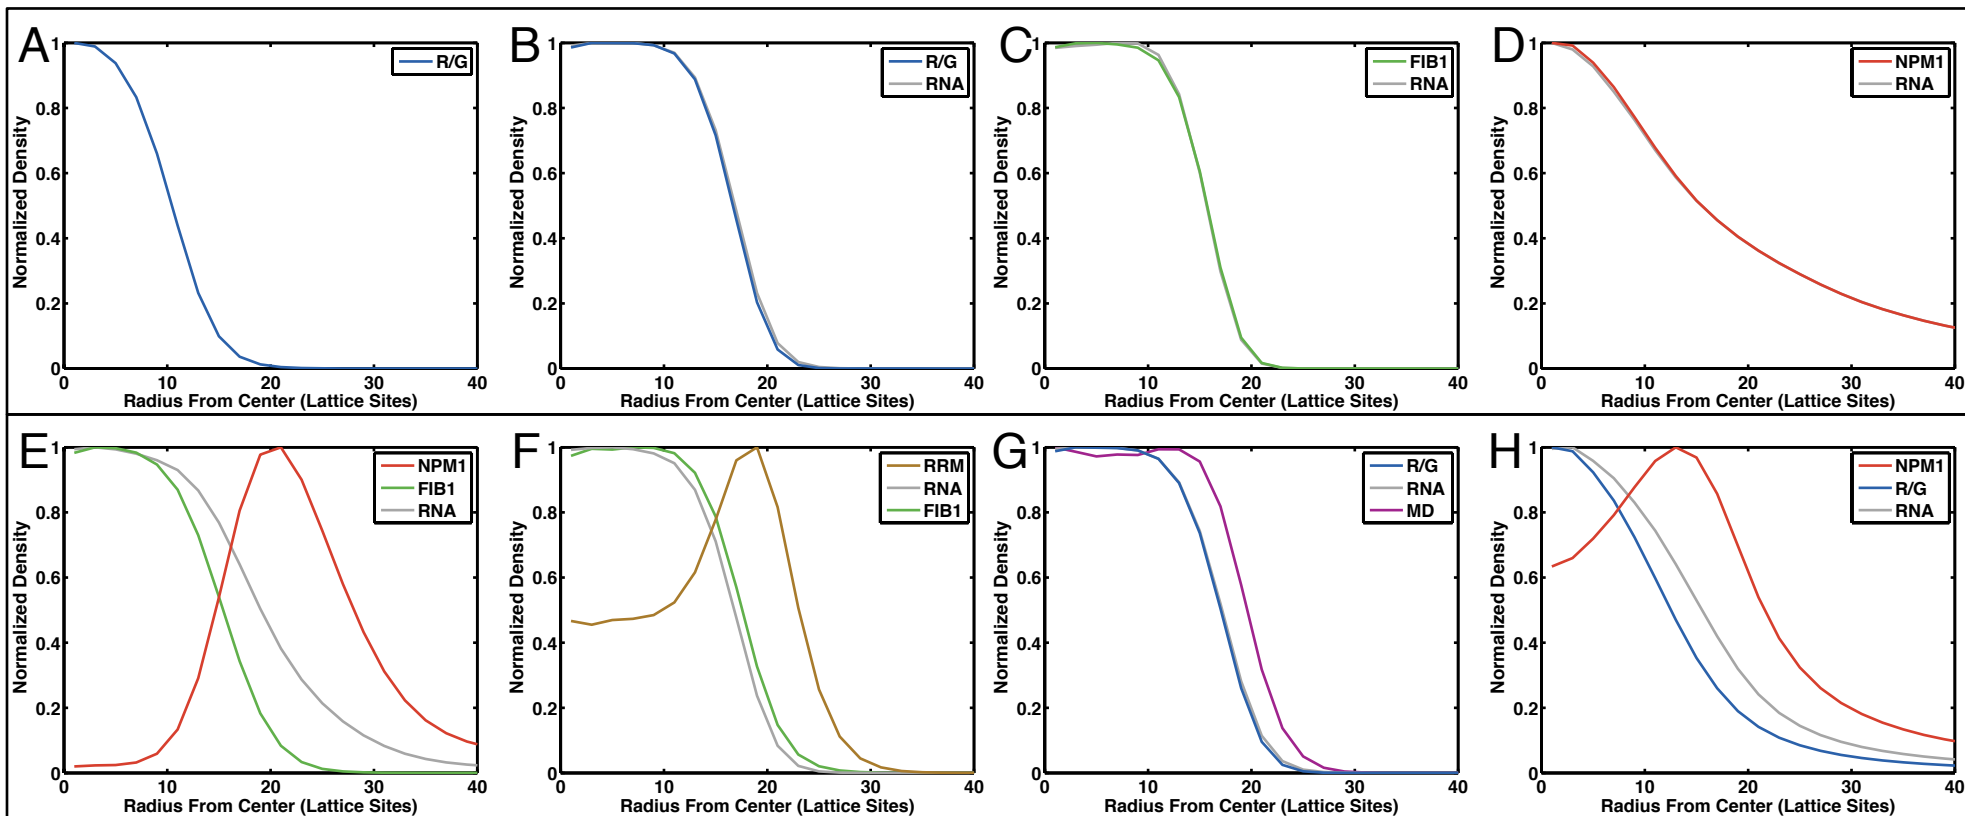

Reproduces 3 phases

MD erroneously mixes with NPM1

R/G erroneously separates from NPM1

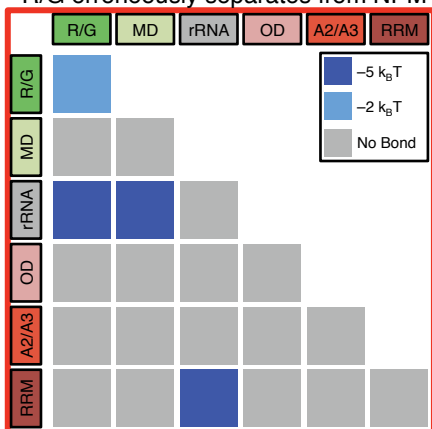

Reproduces 3 phases

R/G erroneously separates from NPM1

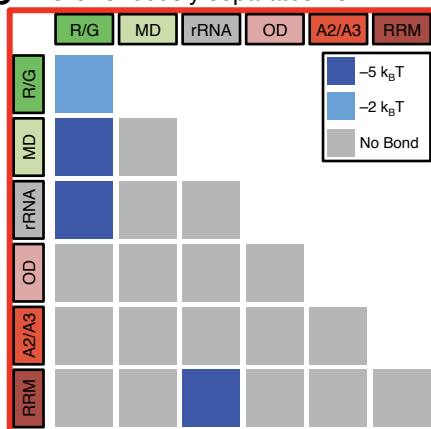

Reproduces totality of experiments

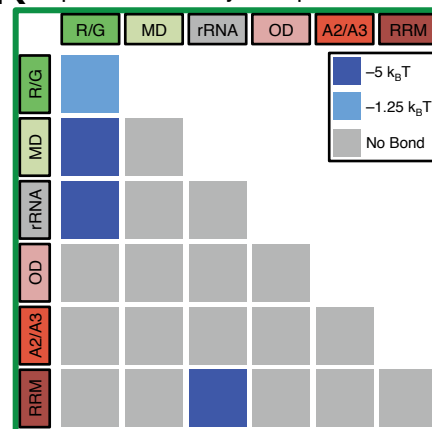

Reproduces totality of experiments

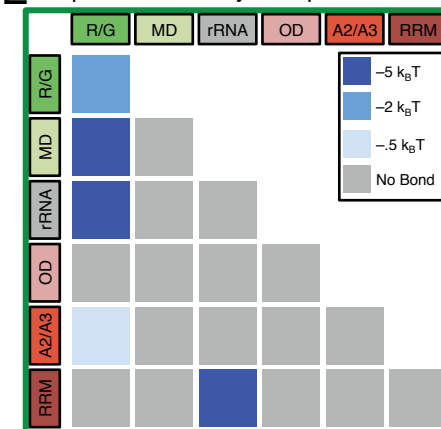

Supplement: NIHMS790117-supplement-06.pdf [file NIHMS790117-supplement-06.pdf]
