# Supplementary material
Source: PubMed Central journal article supplement (PMC5127388)

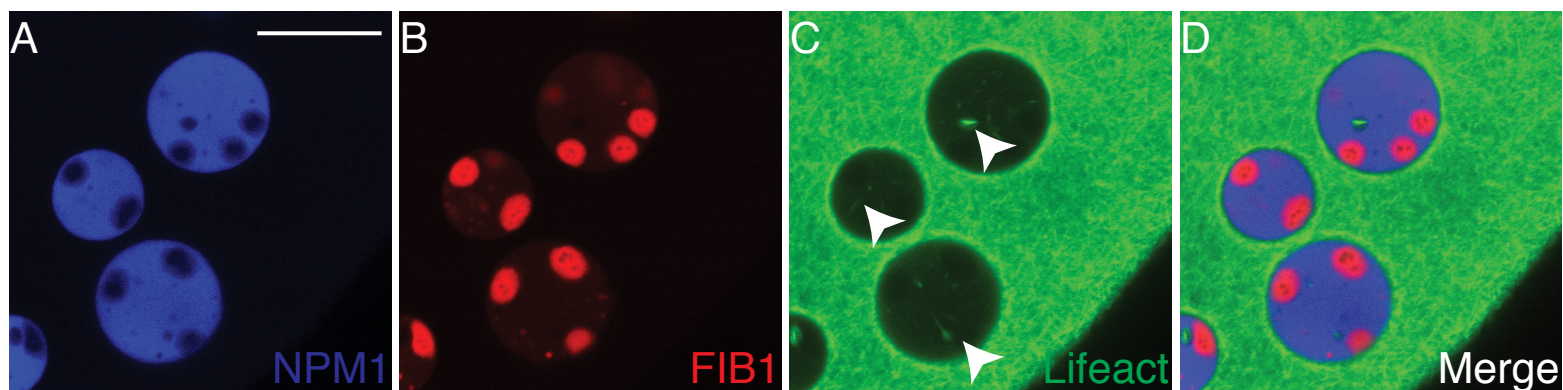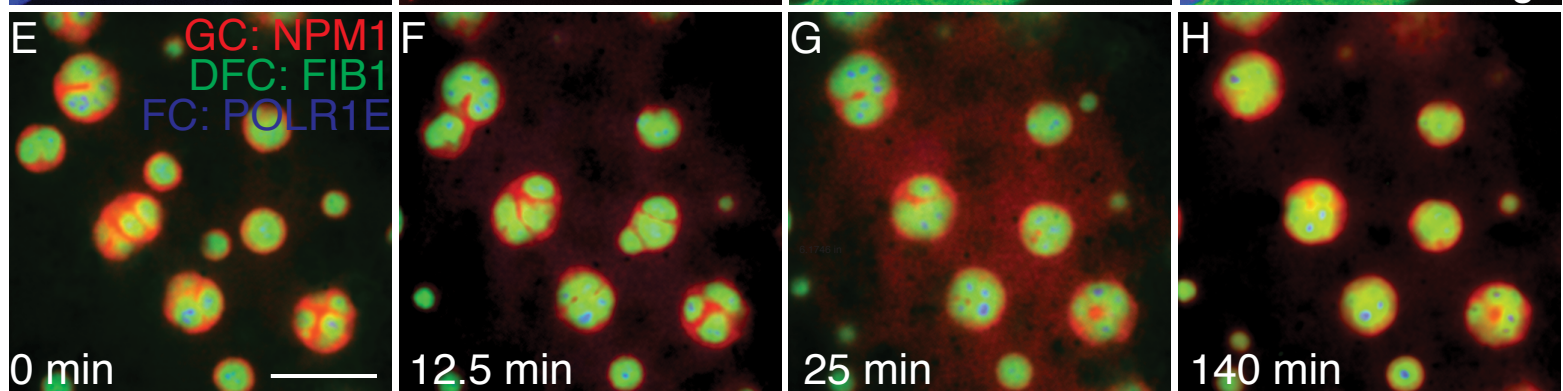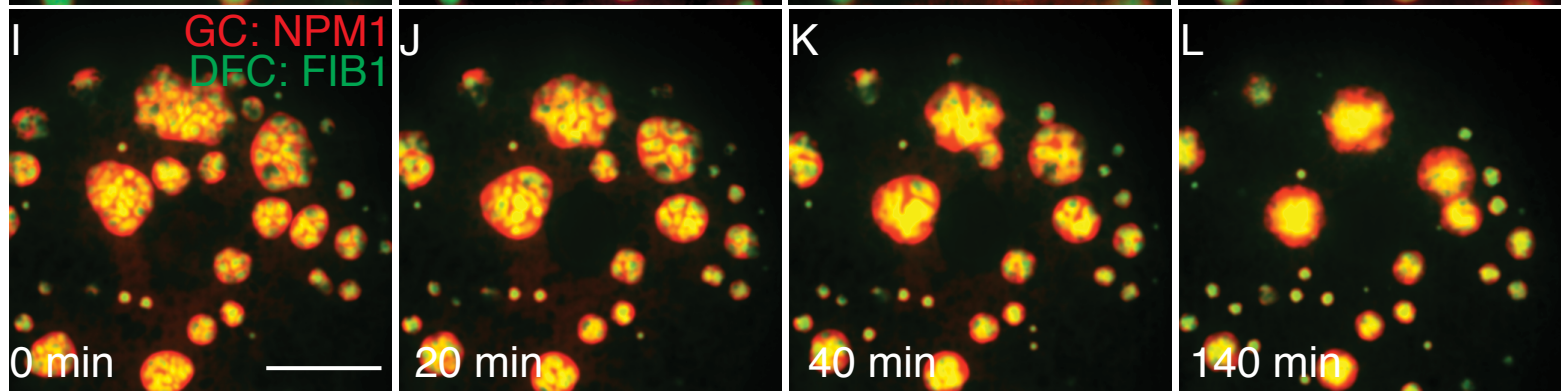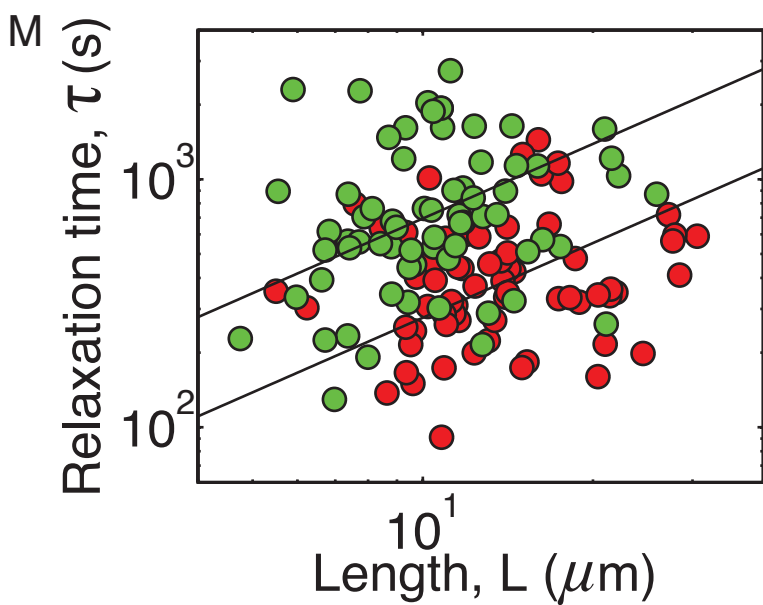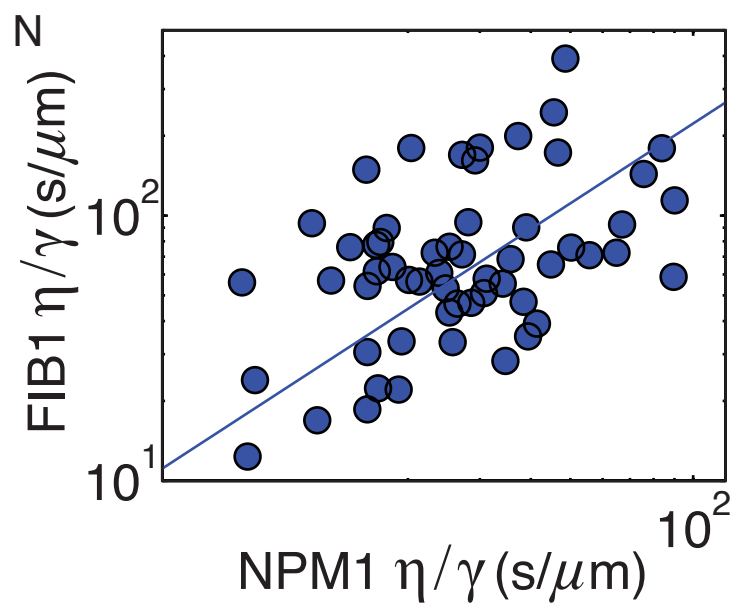

Supplement: NIHMS790117-supplement-01.pdf [file NIHMS790117-supplement-01.pdf]

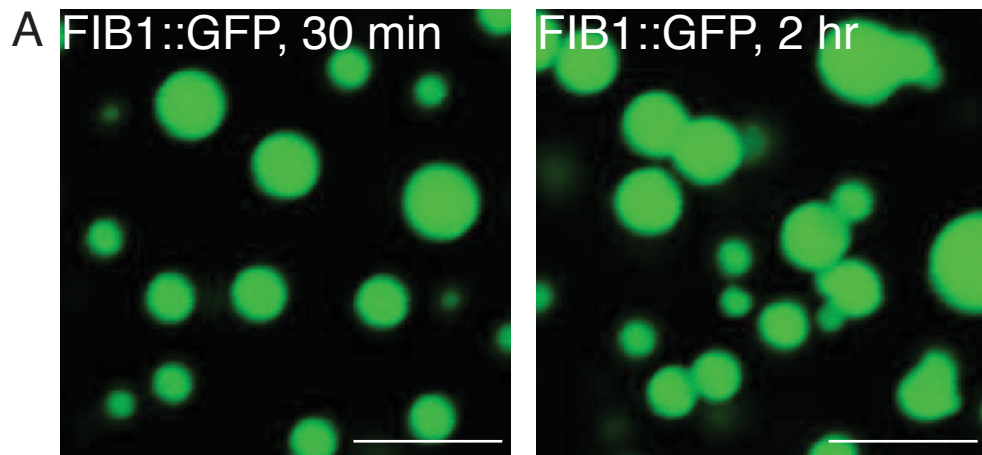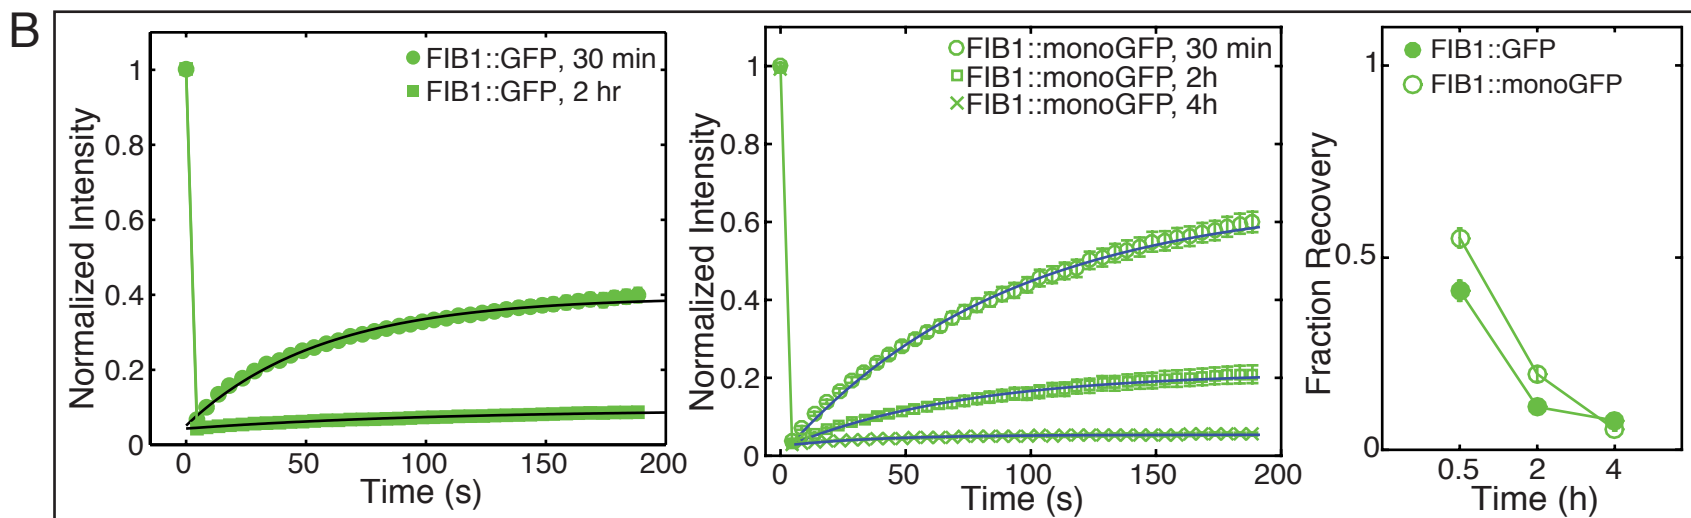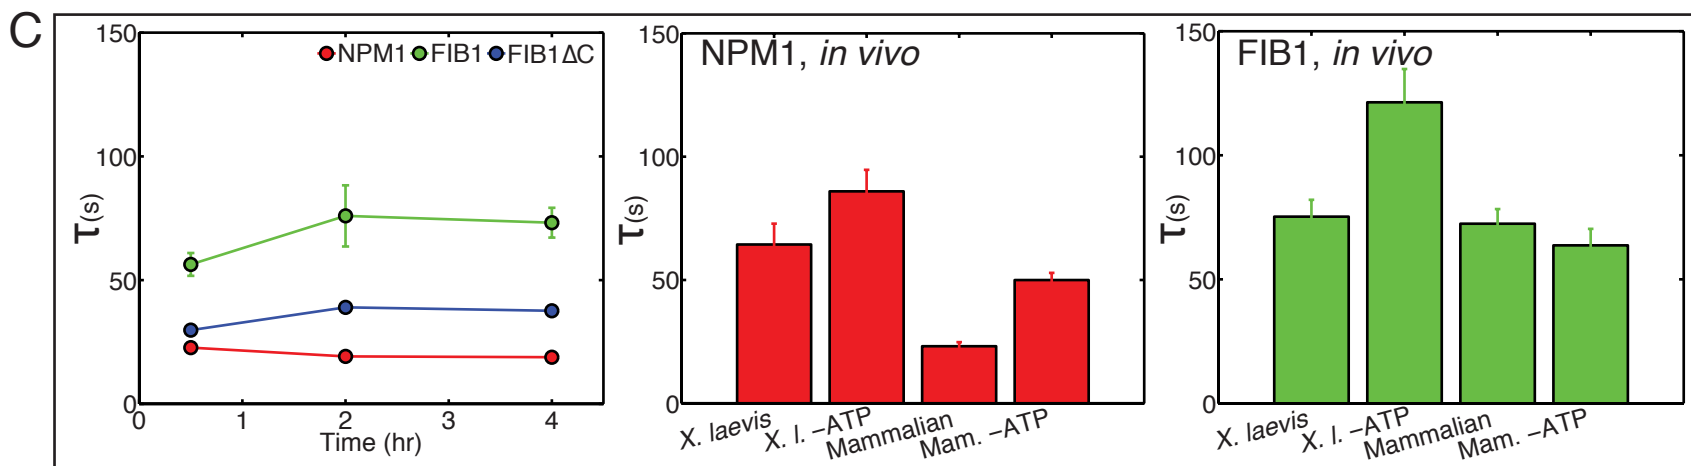

Supplement: NIHMS790117-supplement-03.pdf [file NIHMS790117-supplement-03.pdf]

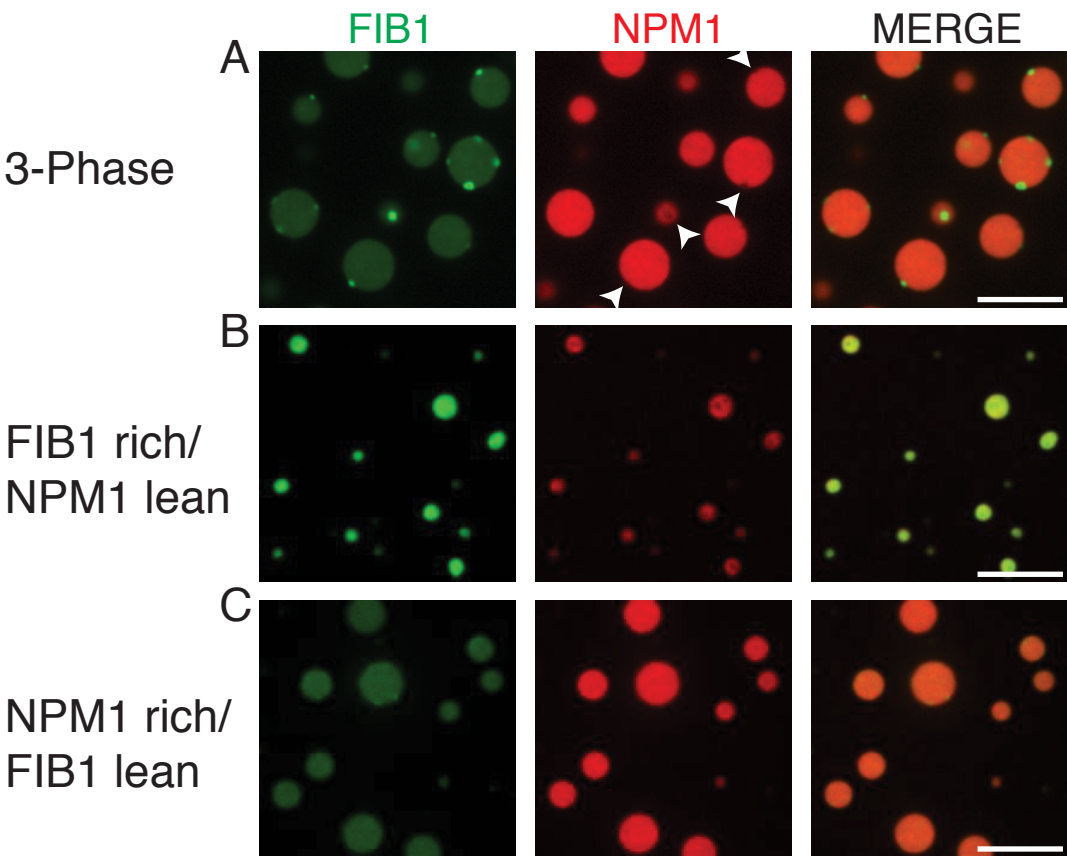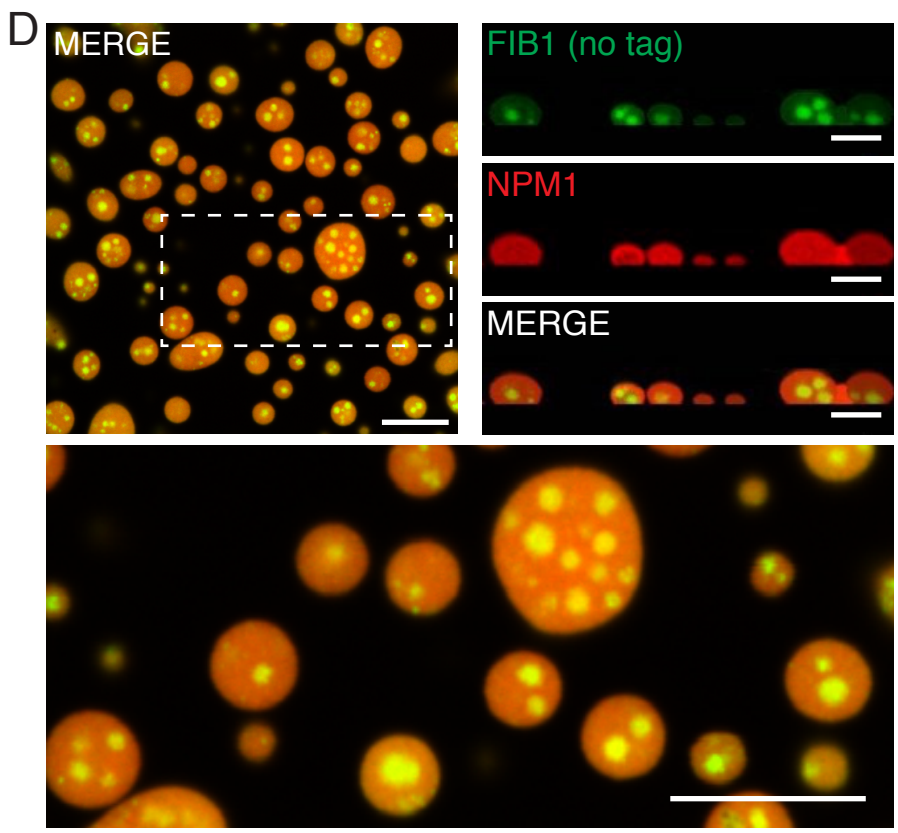

Supplement: NIHMS790117-supplement-04.pdf [file NIHMS790117-supplement-04.pdf]

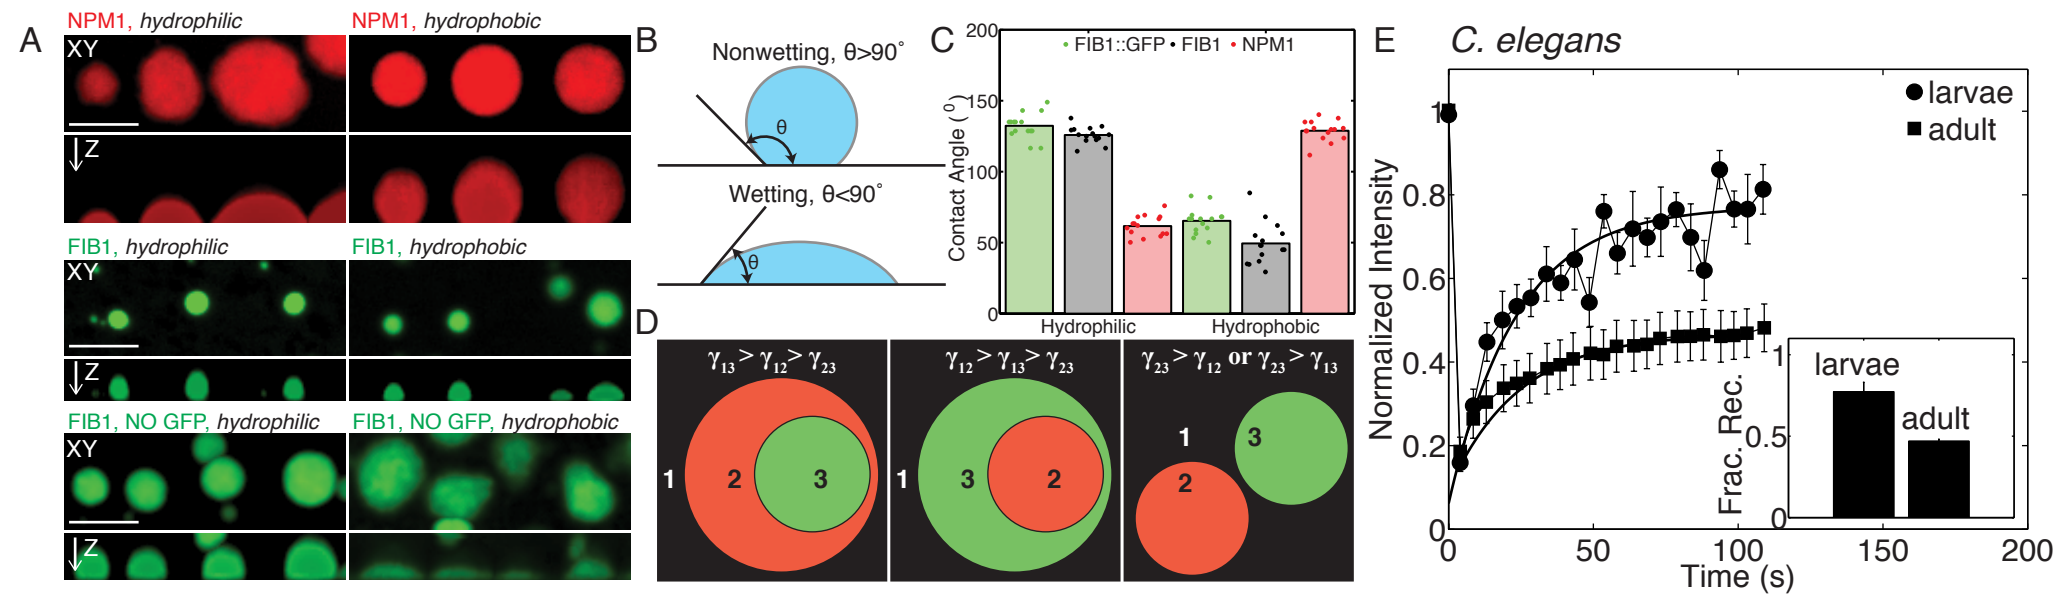

Supplement: NIHMS790117-supplement-07.pdf [file NIHMS790117-supplement-07.pdf]
